# Supplementary material for: Quantitative measurements of thermodynamics and kinetics of polythiophene–DNA complex formation in DNA detection
Source: Royal Society of Chemistry journal article supplement (doi:10.1039/c4bm00210e), 2014-07-14
Supplement: c4bm00210e1.pdf [file c4bm00210e1.pdf]

## Supporting Information

### **Quantitative Measurements of Thermodynamics and Kinetics of Polythiophene-DNA Complex Formation in DNA Detection**

Weiming Zheng<sup>†</sup> and Lin He\*

Department of Chemistry, North Carolina State University, Raleigh, NC 27695

\*Corresponding Author: Lin\_He@ncsu.edu, 1-919-515-2993 (Tel), 1-919-515-8920 (Fax).

<sup>†</sup>Current address: Clinical Diagnostic Group, Bio-Rad Laboratories, Benicia, CA 94510

Submitted to *Biomaterials Science*

**Table S1: Summary of DNA sequences used in this study:**

| <b>Name</b> | <b>Sequence</b>                                                                    | <b>Description</b>                        |
|-------------|------------------------------------------------------------------------------------|-------------------------------------------|
| <i>XI</i>   | 5'TAA CAA TAA TCC CTC                                                              | DNA probe                                 |
| <i>XI'</i>  | 5'-TAA CAA TAA TCC CTC A <sub>20</sub> -<br>C <sub>3</sub> -S-S-C <sub>3</sub> -OH | DNA probe to bind on silica nanoparticles |
| <i>YI</i>   | 5'-GAG GGA TTA TTG TTA                                                             | DNA Complementary to <i>XI, XI'</i>       |

**Calculation of surface density of immobilized polymer-ssDNA duplex on silica nanoparticles:**

Volume of 100-nm silica nanoparticle,  $V = (\pi/6)*D^3 = (3.14/6)*(10^{-5} \text{ cm})^3 = 5.2*10^{-16} \text{ cm}^3$ ;

Surface area of 100-nm silica nanoparticle,  $S = \pi D^2 = 3.14*(10^{-5} \text{ cm})^2 = 3.14*10^{-10} \text{ cm}^2$ ;

Weight of silica nanoparticle,  $W = \rho*V = (1.96 \text{ g/mL}) *(5.2*10^{-16} \text{ cm}^3) = 1.02*10^{-15} \text{ g}$ ;

For 100  $\mu\text{L}$  of 15mg/mL particle solution, total weight of particle,  $W_t$ :

$$W_t = (100*10^{-6} \text{ L}) * (15 \text{ mg/mL}) = 1.5*10^{-3} \text{ g};$$

Number of particles in solution,  $N = W_t/W = (1.5*10^{-3} \text{ g})/(1.02*10^{-15} \text{ g}) = 1.5*10^{12}$ ;

Total surface area of particles,  $S_t = N*S = (1.5*10^{12}) * (3.14*10^{-10} \text{ cm}^2) = 471 \text{ cm}^2$ ;

Surface density of immobilized polymer-ssDNA duplex on particles,  $\Gamma$ :

$$\begin{aligned} \Gamma &= (\text{mole of duplex})/S_t = (100*10^{-6} \text{ L})*(16*10^{-6} \text{ mol/L}) / (471 \text{ cm}^2) \\ &\approx 3*10^{-12} \text{ mol/cm}^2 = 3 \text{ pmol/cm}^2. \end{aligned}$$

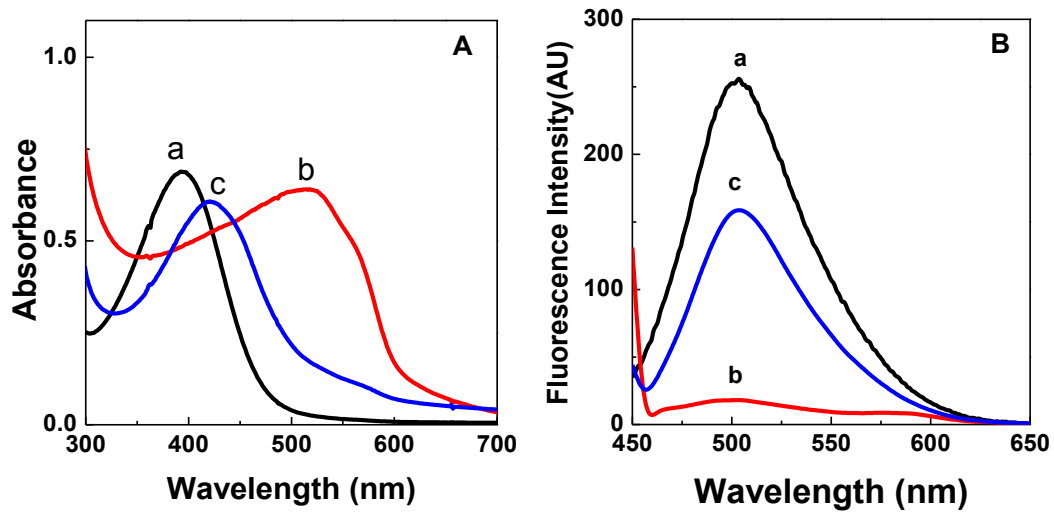

**Supporting Figure 1.** (A) Absorbance and (B) fluorescence emission profiles of conjugated polymer-DNA complexes: (a) free polymer, (b) polymer/ssDNA duplexes, and (c) polymer/dsDNA triplexes.

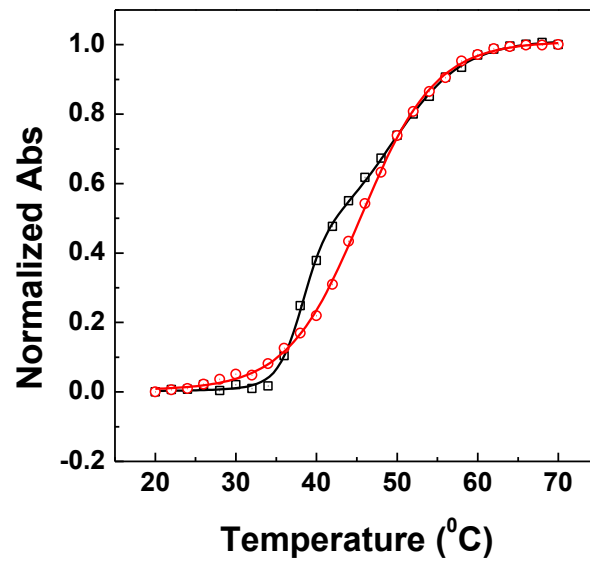

**Supporting Figure 2.** Melting curves of the polymer-ssDNA duplexes in 10 mM PB buffer monitored at 260 nm (black squares) and 500 nm (red circles). The corresponding solid lines are the best fit of experimental data.

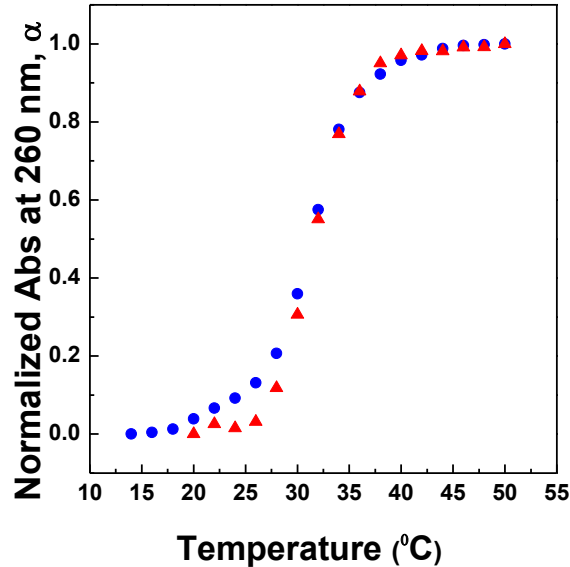

**Supporting Figure 3.** The melting curves of dsDNA in solution without (red triangles) or with (blue circles) the extra A<sub>20</sub> spacer. The presence of A<sub>20</sub> as the spacer only slightly changed the melting temperature of dsDNA at the absence polymer with the calculated K value increased from  $2.2 \times 10^{-8}$  to  $4.3 \times 10^{-8}$ . No stability change was observed for the polymer-dsDNA system, primarily due to the much higher temperature needed to dissociate polymer-dsDNA triplexes that no polymer-ssA<sub>20</sub>, if any, would be able to survive.

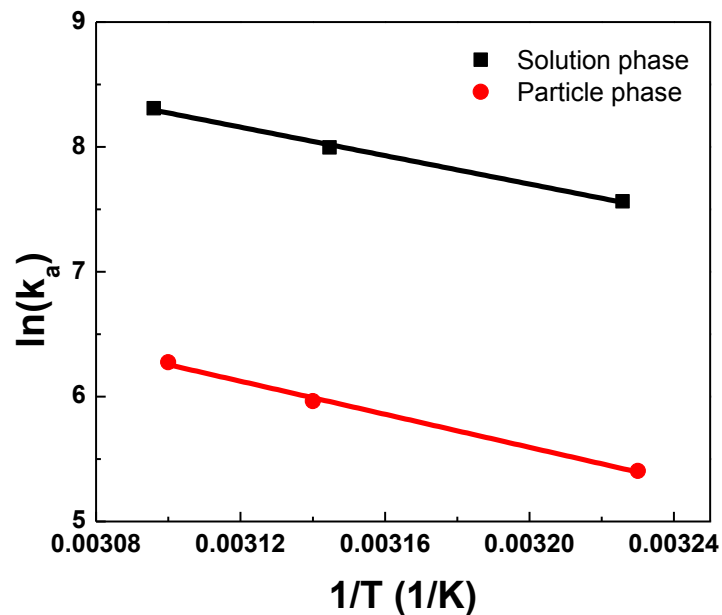

**Supporting Figure 4.** Arrhenius plots for conjugated polymer-bound DNA hybridization in solution phase and on particle phase. Association rate constants were determined from the fitting curves recorded at different temperatures.
